# Supplementary material
Source: ML conference proceedings conference paper supplement (https://proceedings.neurips.cc/paper_files/paper/2019/hash/e9fd7c2c6623306db59b6aef5c0d5cac-Abstract.html)

Covtype

Square Error

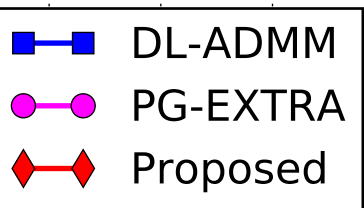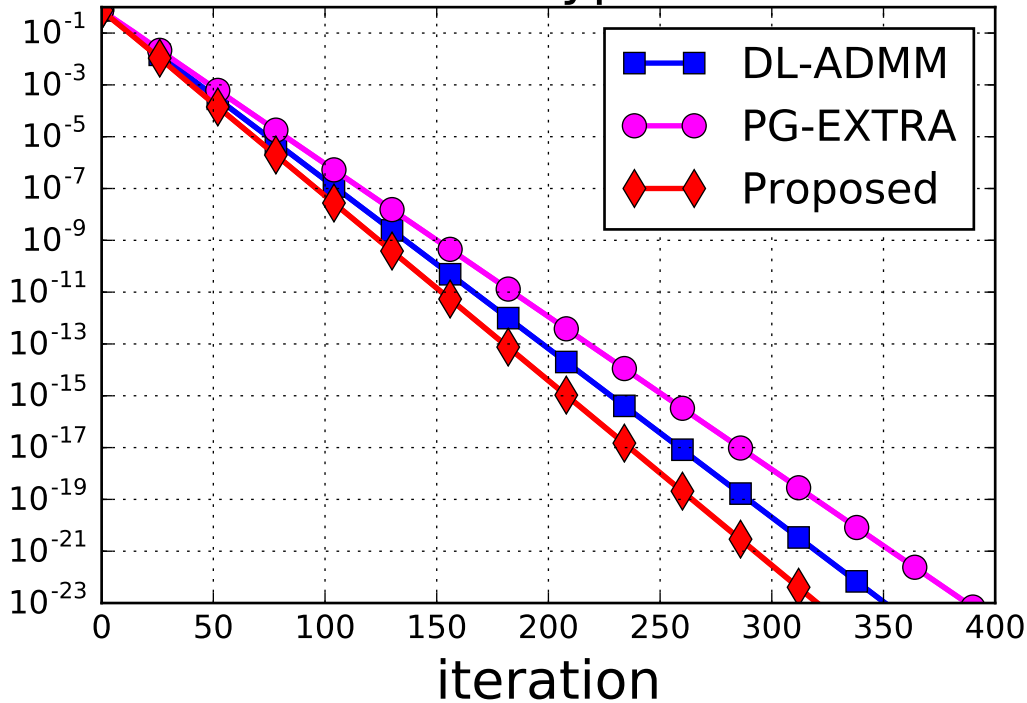

Supplement: Supplementary file [file e9fd7c2c6623306db59b6aef5c0d5cac-Supplemental.zip]
